# Supplementary material for: Spectrum Bias and Individual Strengths of SARS-CoV-2 Serological Tests—A Population-Based Evaluation
Source: MDPI journal article supplement (doi:10.3390/diagnostics11101843), 2021-10-06
Supplement: s1 [file s1]

**Correlation  
VSV-Pseudotype vs. SARS-CoV-2 WT  
Neutralization**

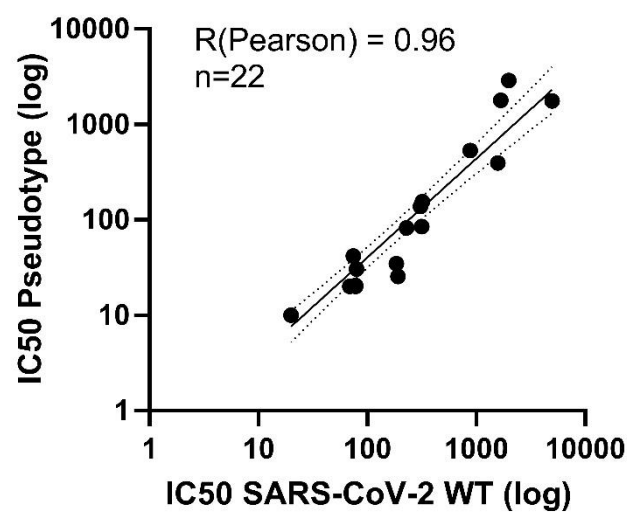

**Supplementary Figure S1.** Correlation of VSV pseudoviral versus SARS-CoV-2 neutralization (as described in (1)) for  $n = 22$  sera (Pearson  $R=0.96$ ).

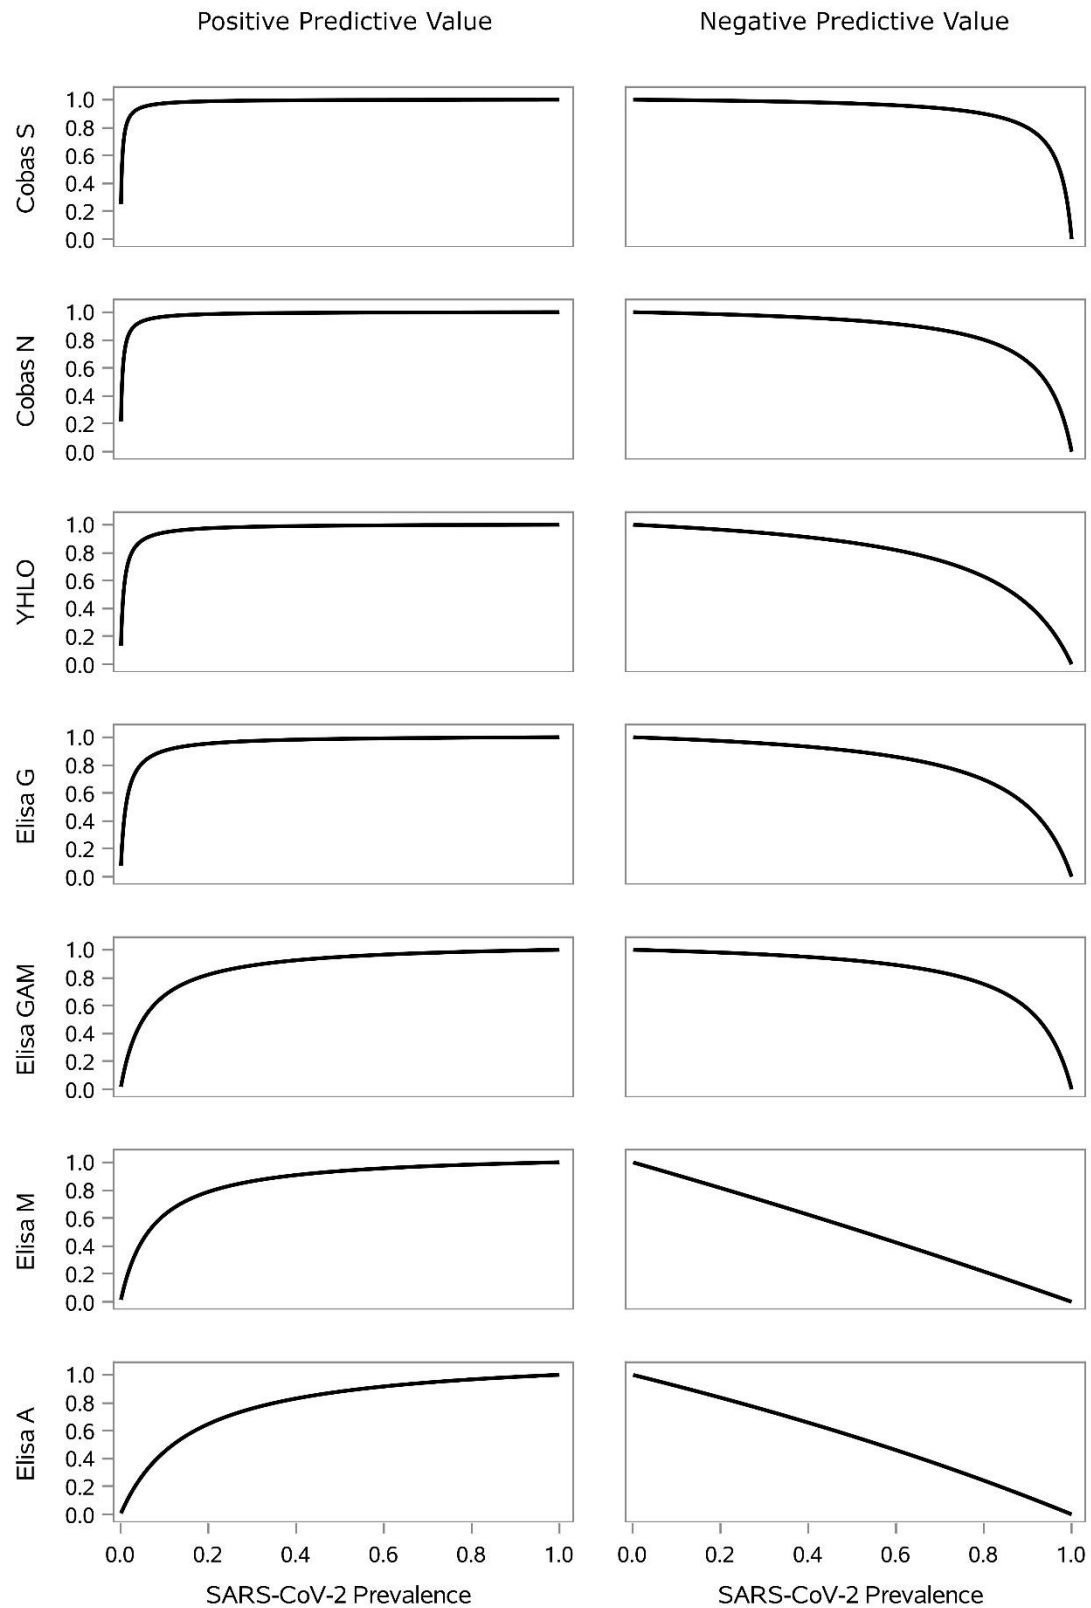

**Supplementary Figure S2.** Model of positive and negative predictive values of each serological assay with respect to seroprevalence.

**Supplementary Table S1.** Spearmans rank-correlation coefficients of serological assays and neutralization, within in all tests (ELISA\_G, COBAS\_N, COBA\_S; YHLO; Neutralization) positive population (n = 310) to quantify general monotonous connection with 95% CI. (Further experimental inclusion constraints: COBAS\_S ≤ 2500; ELISA\_G ≤ 15; Neutralization IC<sub>50</sub> ≤ 2560)

| <b>Spearman<br/>95% CI</b>            | <b>COBAS_S<br/>(log)</b>        | <b>COBAS_N<br/>(log)</b>        | <b>Elisa_G<br/>(lin)</b>        | <b>YHLO<br/>(log)</b>           | <b>Neutra-<br/>lization (log)</b> |
|---------------------------------------|---------------------------------|---------------------------------|---------------------------------|---------------------------------|-----------------------------------|
| <b>COBAS_S<br/>(log)</b>              |                                 |                                 |                                 |                                 |                                   |
| <b>COBAS_N<br/>(log)</b>              | <b>0.3667</b><br>0.2692; 0.4641 |                                 |                                 |                                 |                                   |
| <b>Elisa_G<br/>(lin)</b>              | <b>0.7714</b><br>0.7136; 0.8291 | <b>0.4256</b><br>0.3316; 0.5196 |                                 |                                 |                                   |
| <b>YHLO<br/>(log)</b>                 | <b>0.4903</b><br>0.4036; 0.5770 | <b>0.7323</b><br>0.6764; 0.7882 | <b>0.5772</b><br>0.4988; 0.6555 |                                 |                                   |
| <b>Neutra-<br/>lization<br/>(log)</b> | <b>0.5300</b><br>0.4451; 0.6148 | <b>0.3028</b><br>0.2039; 0.4017 | <b>0.6592</b><br>0.5872; 0.7312 | <b>0.4658</b><br>0.3760; 0.5555 |                                   |
